# Supplementary material
Source: publisher figshare collection journal article supplement (https://acs.figshare.com/ndownloader/files/31262174)
Supplement: Supplementary file 1 [file 31262174]

# Supporting Information

## A Superlattice-Stabilized Layered CuS Anode for High-Performance Aqueous Zinc-Ion Batteries

*Jiaqian Zhang<sup>†, #</sup>, Qi Lei<sup>‡, &, #</sup>, Zhiguo Ren<sup>§</sup>, Xiaohui Zhu<sup>||</sup>, Ji Li<sup>‡, &</sup>, Zhao Li<sup>⊥</sup>, Shilei Liu<sup>\*§</sup>, Yiran Ding<sup>||</sup>, Zheng Jiang<sup>§</sup>, Jiong Li<sup>§</sup>, Yaobo Huang<sup>§</sup>, Xiaolong Li<sup>§</sup>, Xingtai Zhou<sup>‡</sup>, Yong Wang<sup>§, \*</sup>, Daming Zhu<sup>§, \*</sup>, Mengqi Zeng<sup>†, \*</sup>, and Lei Fu<sup>†, \*</sup>*

<sup>†</sup>College of Chemistry and Molecular Sciences, Wuhan University, Wuhan 430072, China

<sup>‡</sup>Shanghai Institute of Applied Physics, Chinese Academy of Sciences, Shanghai 201800, China

<sup>&</sup>University of Chinese Academy of Sciences, Beijing 100049, China

<sup>§</sup>Shanghai Advanced Research Institute, Chinese Academy of Sciences, Shanghai 201204, China

<sup>||</sup>The Institute for Advanced Studies (IAS), Wuhan University, Wuhan 430072, China

<sup>⊥</sup>National Engineering Research Center of Light Alloy Net Forming, State Key Laboratory of Metal Matrix Composite, School of Materials Science and Engineering, Shanghai Jiao Tong University, Shanghai, 200240, China

<sup>\*§</sup>School of Physical Science and Technology, ShanghaiTech University Shanghai 201210, China.

\*Corresponding Author

E-mail: leifu@whu.edu.cn (L. Fu); zengmq\_lan@whu.edu.cn (M. Q. Zeng);

zhudaming@zjlab.org.cn (D. M. Zhu); wangyong@sinap.ac.cn (Y. Wang)

<sup>#</sup>These authors contributed equally to this work.

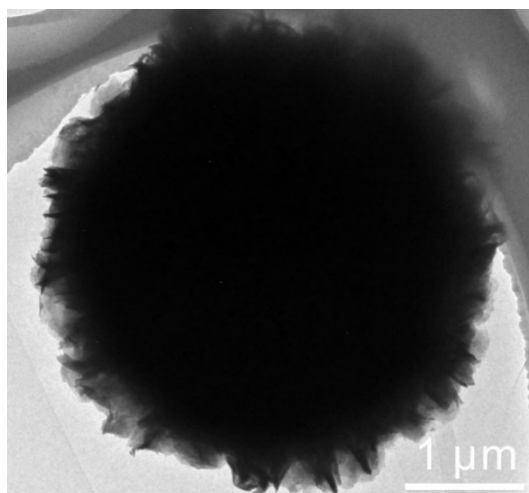

**Figure S1.** TEM images of CuS-CTAB microspheres. The monodispersed CuS-CTAB superlattice shows micro flower morphology with a diameter of  $\approx 2\text{--}3\text{ }\mu\text{m}$ .

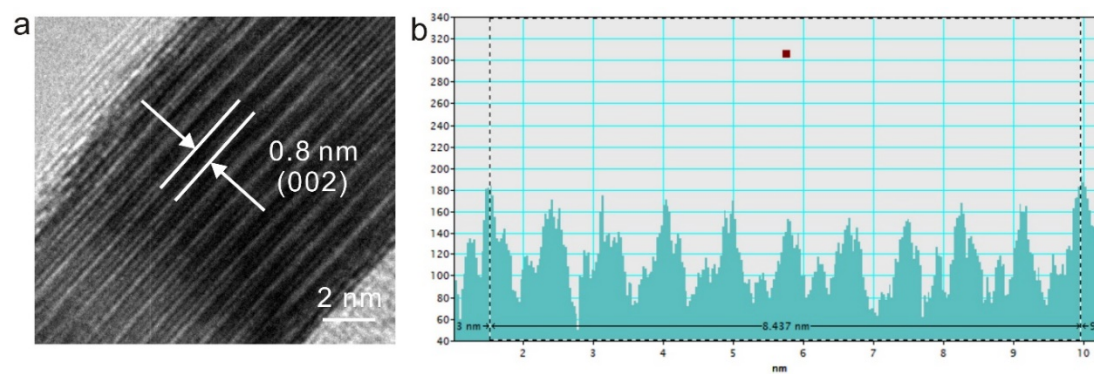

**Figure S2.** (a) TEM images and (b) line intensity profiles of pure CuS. It suggests that the (002) interlayer spacing of pure CuS is 0.84 nm.

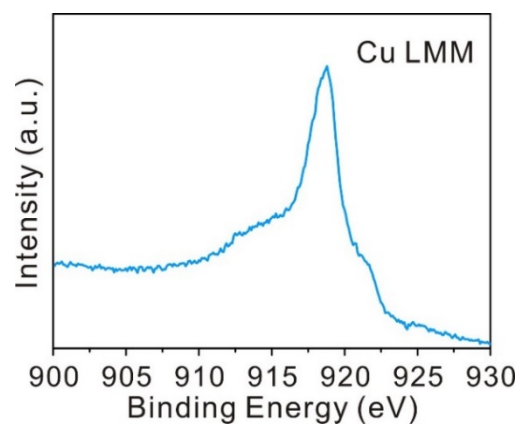

**Figure S3.** High-resolution Cu XPS spectrum of the as-prepared CuS-CTAB.

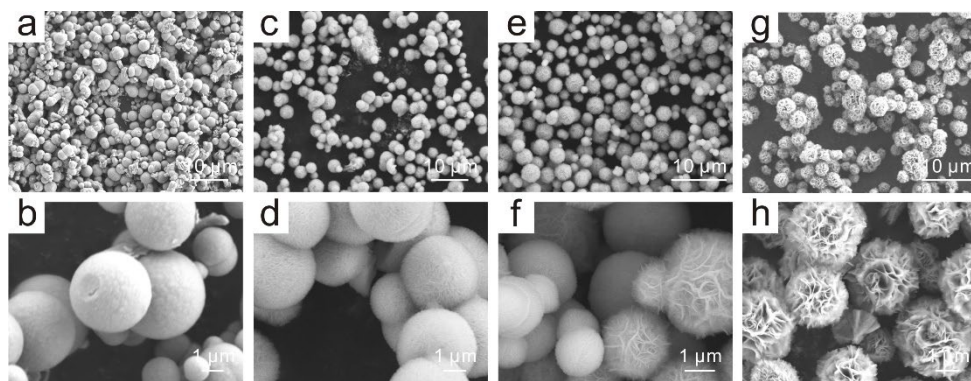

**Figure S4.** SEM images of CuS-CTAB with different amounts of CTAB for (a) 0 g, (c) 0.1 g, (e) 0.2 g, (g) 0.4 g and the corresponding enlarged images for (b), (d), (f), and (h). It indicates that CUS-CTAB-0 shows a sphere shape with smooth surface. On increasing the amount of CTAB, the smooth surface gradually evolved and transformed into the sheet-like structure and ultimately formed into a typical flower-like microsphere morphology at the added amount of 0.4 g.

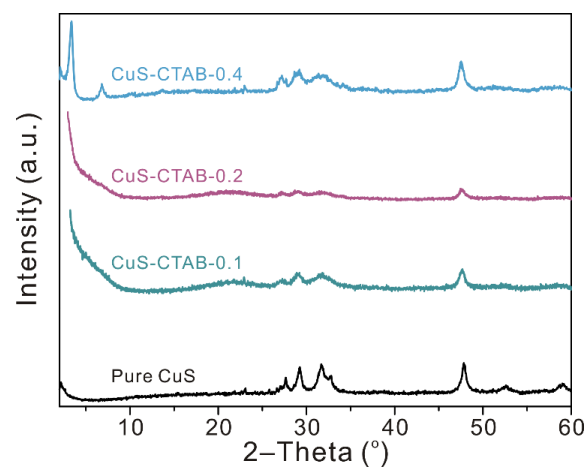

**Figure S5.** XRD patterns of CuS-CTAB with different amounts of CTAB. When the added amounts of CTAB reach to 0.4 g, CTAB molecules will successfully intercalate into the interlayer of CuS and form superlattice structure.

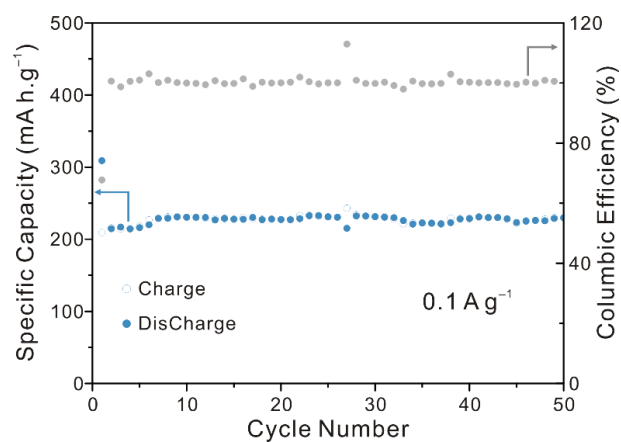

**Figure S6.** Cycling performances and the corresponding Coulombic efficiency of CuS-CTAB electrode at the current density of  $0.1 \text{ A g}^{-1}$ . The cell exhibits high discharge capacity of  $230.1 \text{ mAh g}^{-1}$  and high Coulombic efficiency close to 100%.

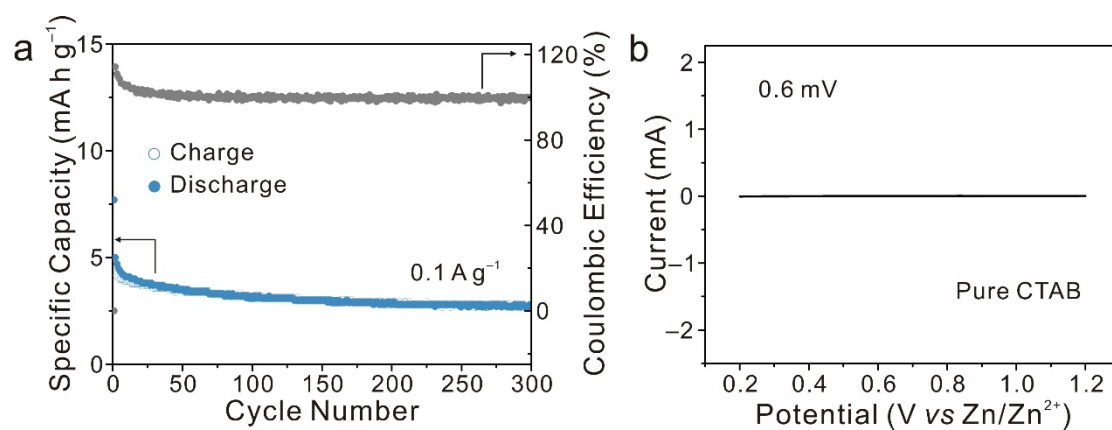

**Figure S7.** (a) Cycling performance of CTAB at  $0.1 \text{ A g}^{-1}$ . (b) CV scanning of CTAB electrode at  $0.6 \text{ mV s}^{-1}$  between 0.2 and 1.2 V (vs  $\text{Zn}^{2+}/\text{Zn}$ ).



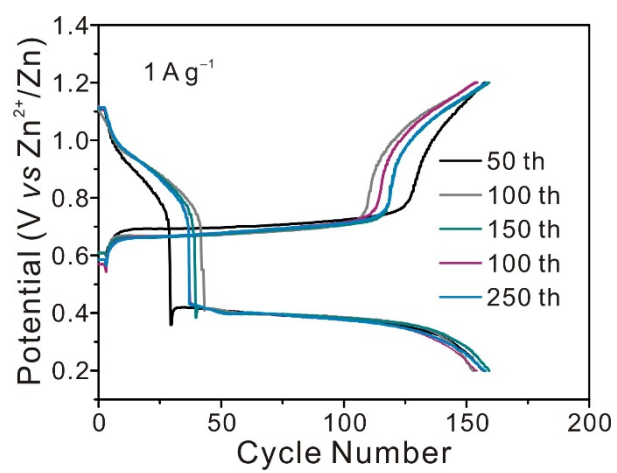

**Figure S8.** Representative galvanostatic charge/discharge curves of the CuS-CTAB at  $1 \text{ A g}^{-1}$ .

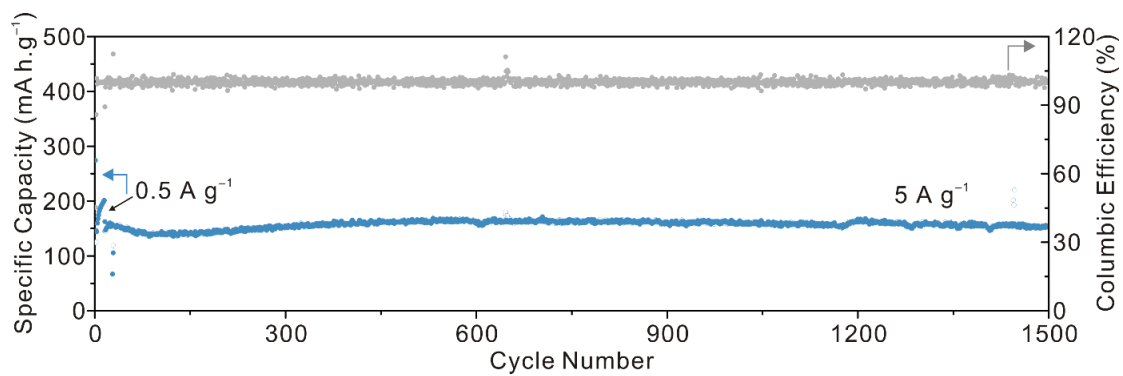

**Figure S9.** Cycling performance and the corresponding Coulombic efficiency of CuS-CTAB at 5 A g<sup>-1</sup>. The cell shows initial discharge capacity of 155.3 mA h g<sup>-1</sup> at 5 A g<sup>-1</sup> and then increases to 163.9 mA h g<sup>-1</sup> because of the activation process. Its capacity fades slightly and the capacity retention can reach to 94.3% over the whole 1500 cycles.

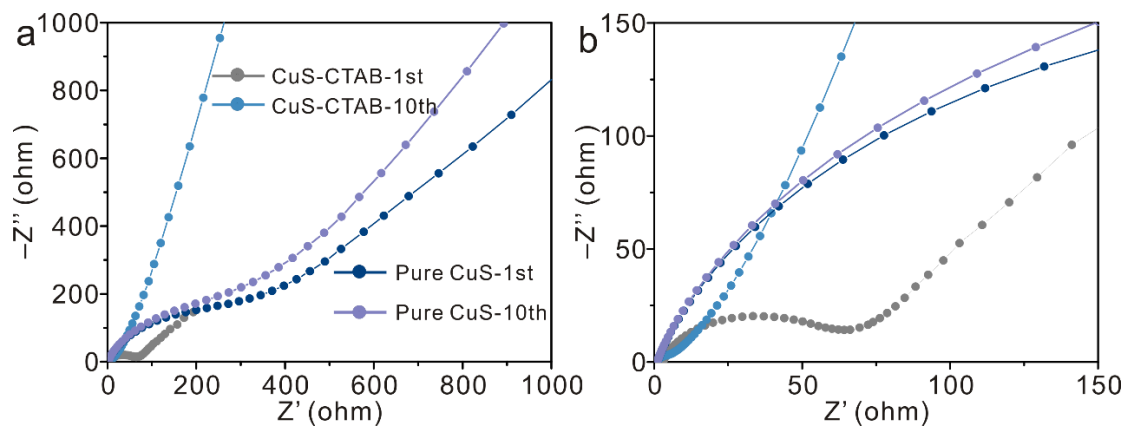

**Figure S10.** (a) EIS spectra and (b) enlarged spectra of CuS-CTAB and pure CuS at selected cycles (1st, 10th). The  $R_{ct}$  values of CuS-CTAB obvious decrease after ten cycles, which are probably attributed to the activation of materials. But the  $R_{ct}$  values of pure CuS have not obvious change.

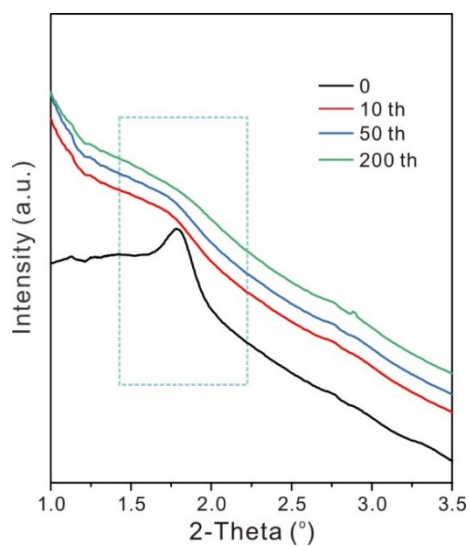

**Figure S11.** XRD patterns of CuS-CTAB electrode under the different cycles at  $1 \text{ A g}^{-1}$  (the wavelength of X-rays was calibrated to  $0.8265 \text{ \AA}$  (15 KeV) by using the LaB6 standard from NIST (660b)).

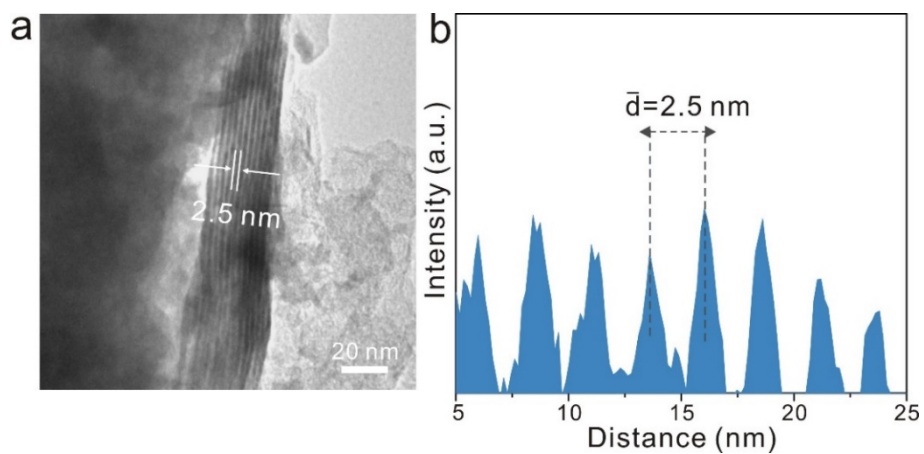

**Figure S12.** (a) HR-TEM image and (b) line intensity profiles of CuS-CTAB superlattice after 50 cycles (at the full discharge state at  $1\text{ A g}^{-1}$ ).

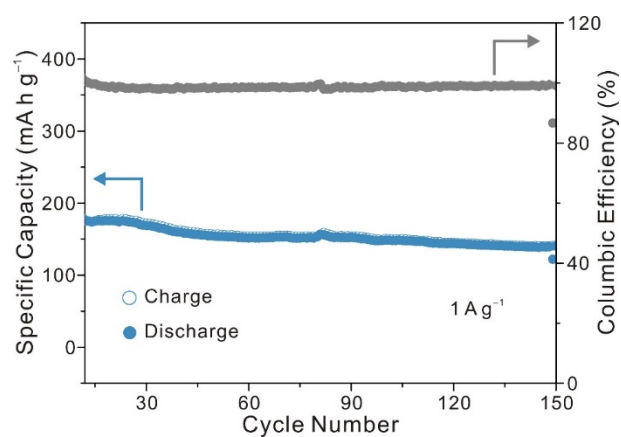

**Figure S13.** Cycling performance and the corresponding Coulombic efficiency of CTAB||Zn<sub>x</sub>MnO<sub>2</sub> full battery at a current of 1 A g<sup>-1</sup>. The cell demonstrates ~175.2 mAh g<sup>-1</sup> with the coulombic efficiency close to 100% at 1 A g<sup>-1</sup>.
